# Supplementary material for: Arf1 coordinates fatty acid metabolism and mitochondrial homeostasis
Source: PubMed Central journal article supplement (PMC10415182; doi:10.1038/s41556-023-01180-2), 2023-07-03

**WB related to Figure 3A**

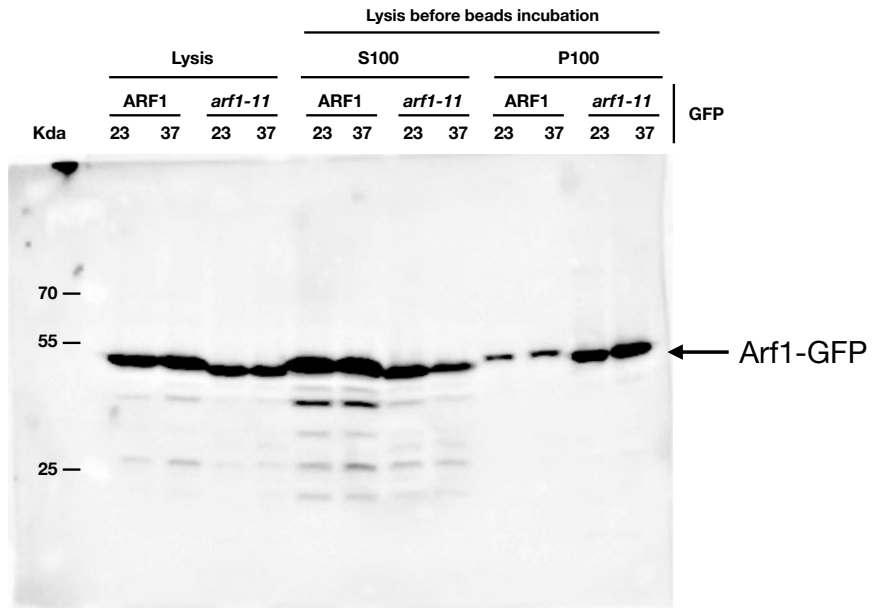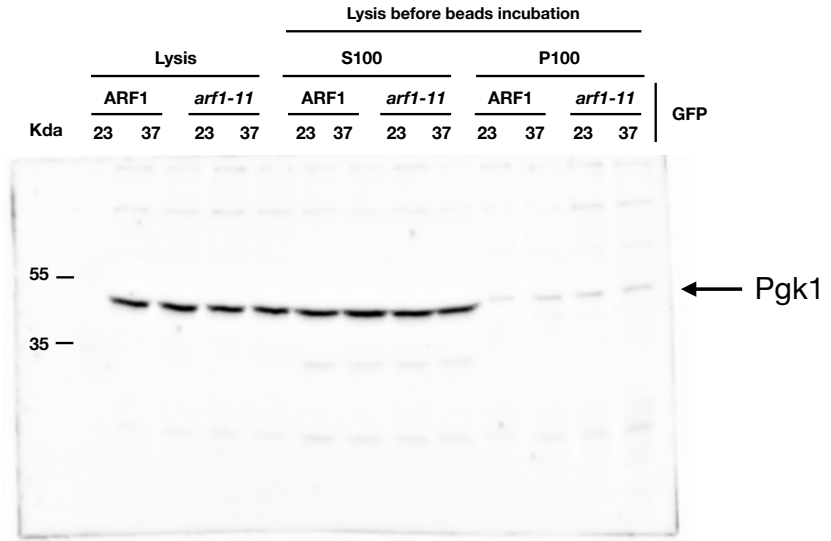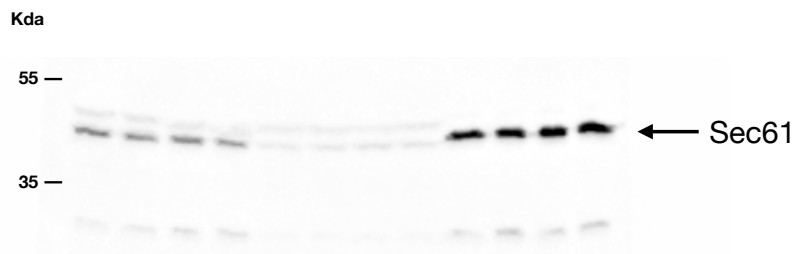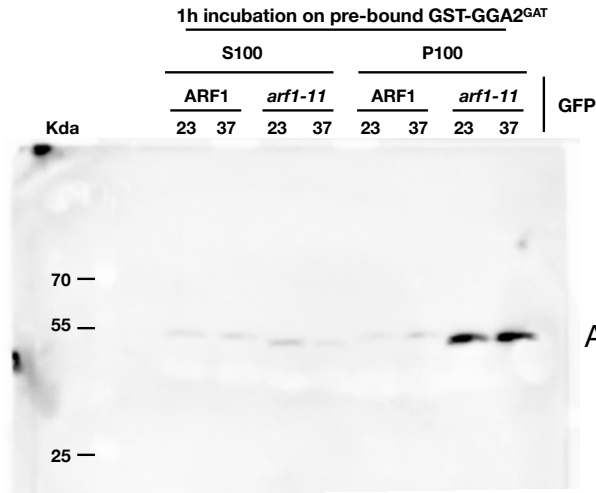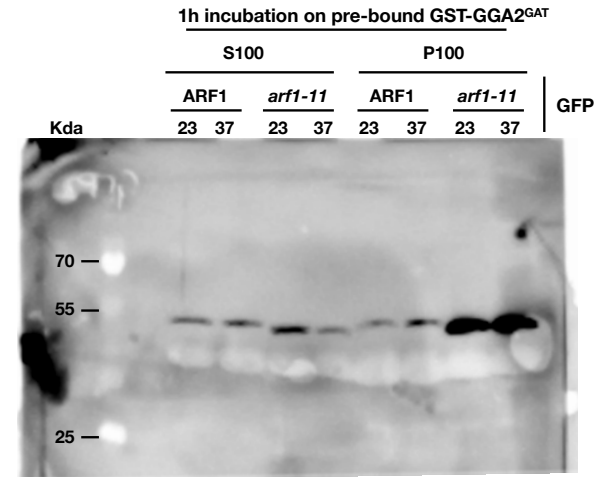

**WB related to Figure 3B**

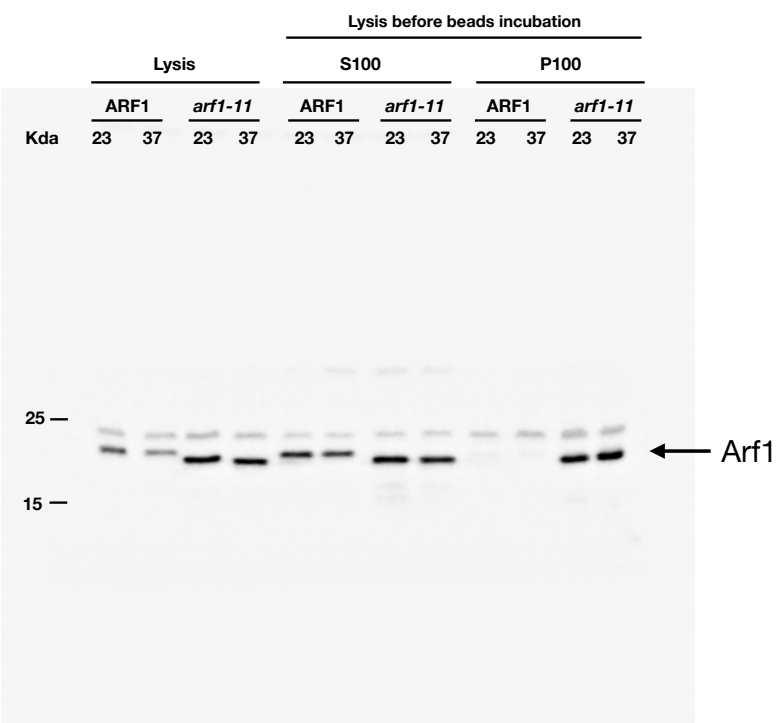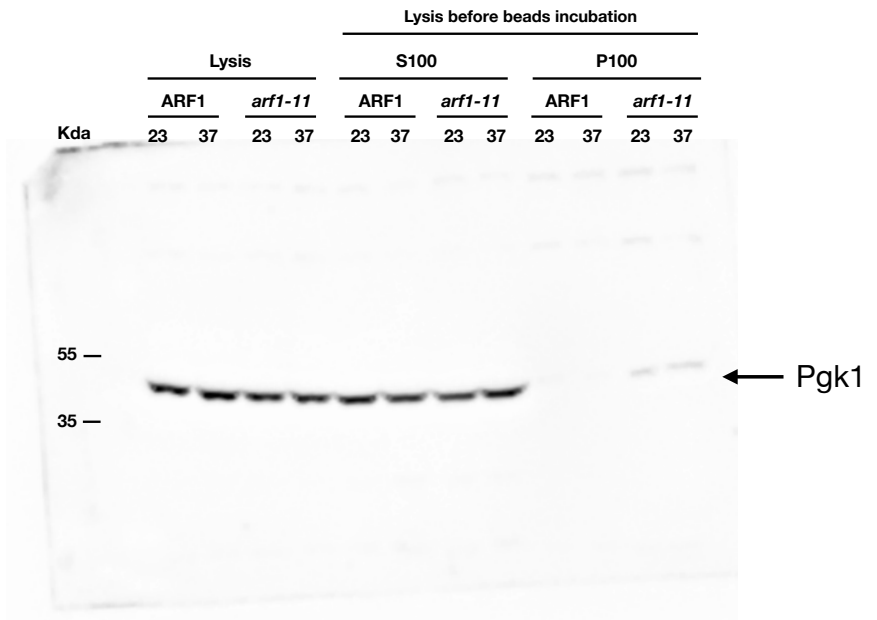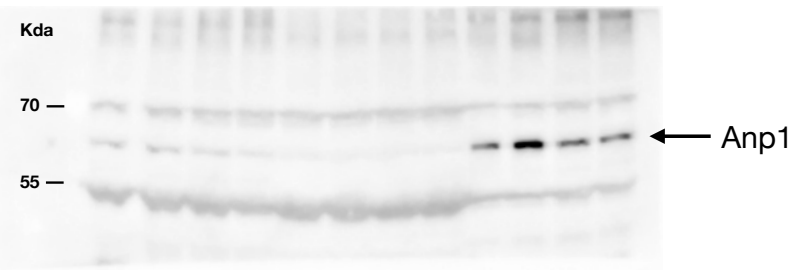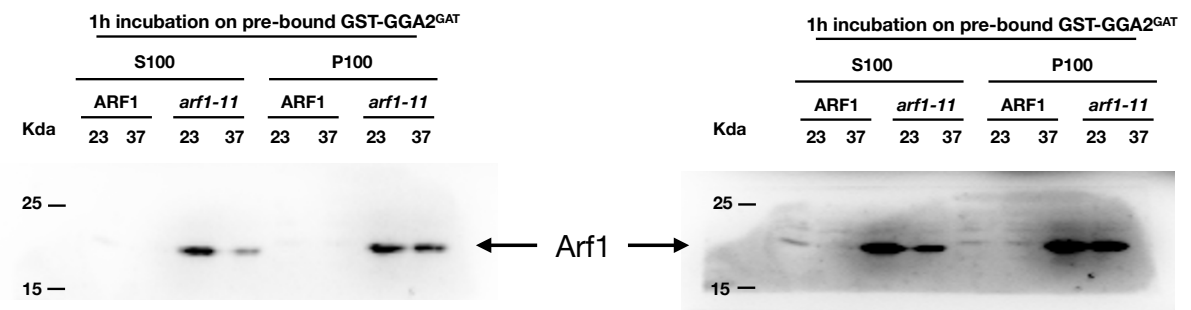

**WB related to Figure 7B**

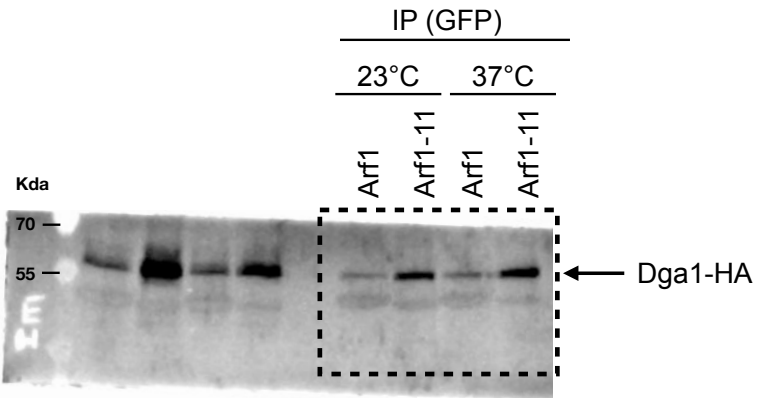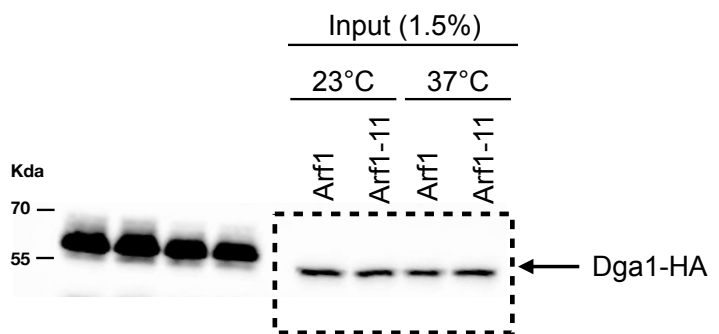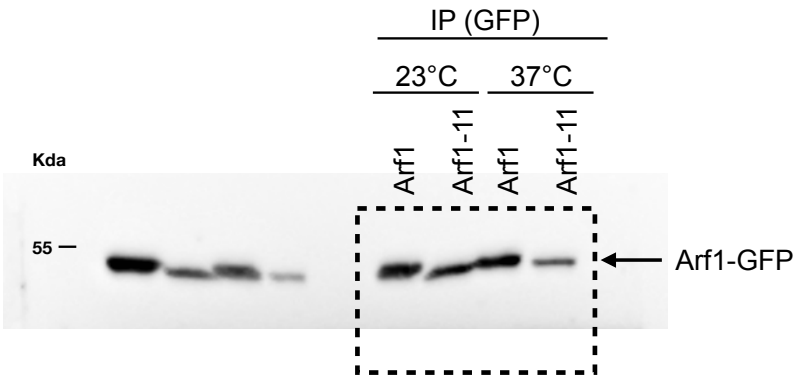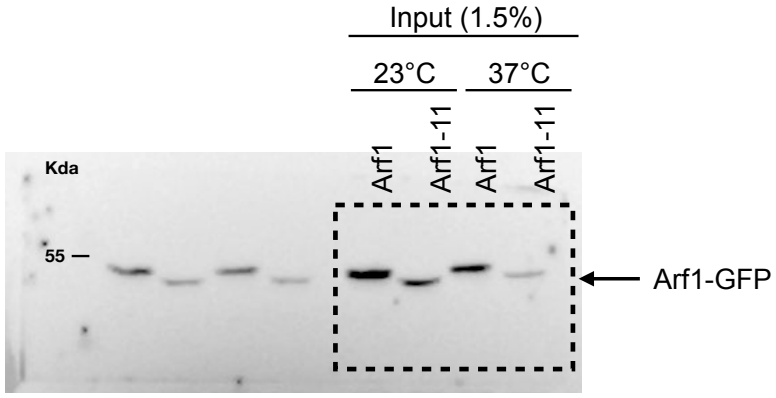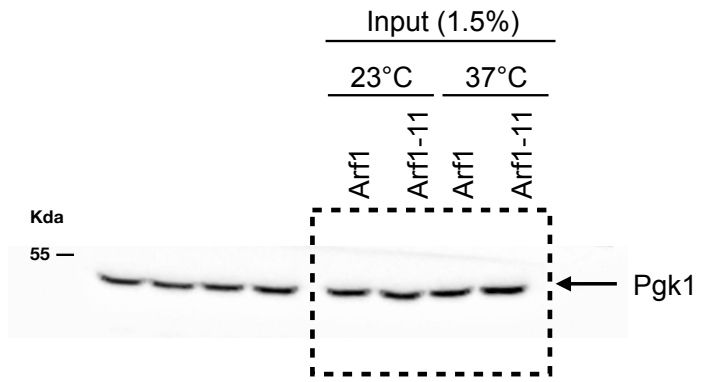

**WB related to Figure 7D**

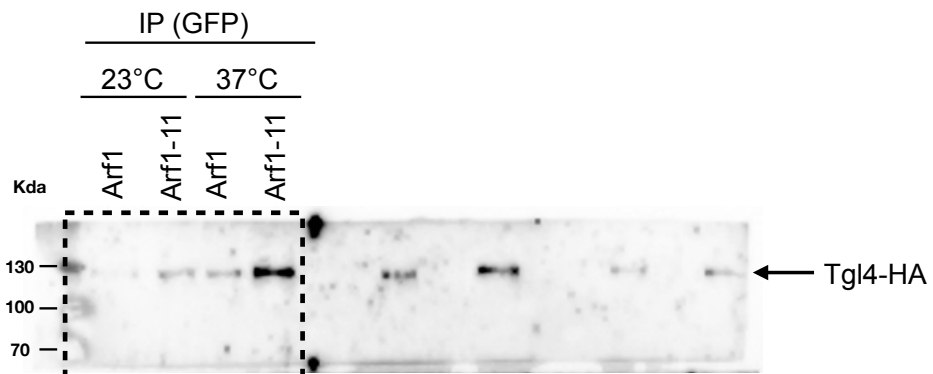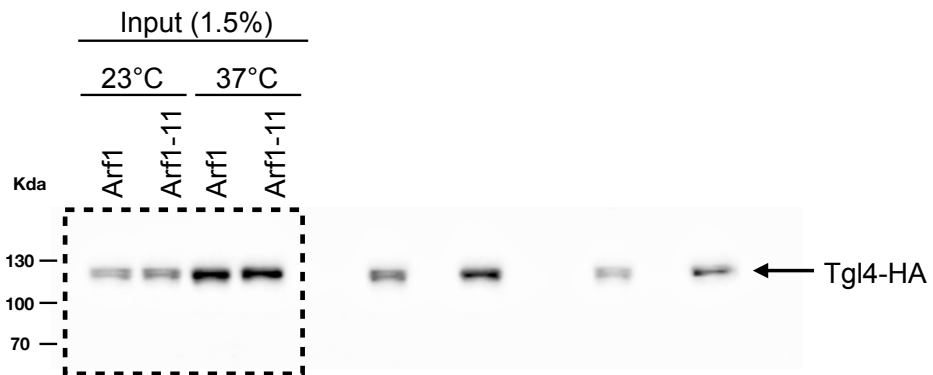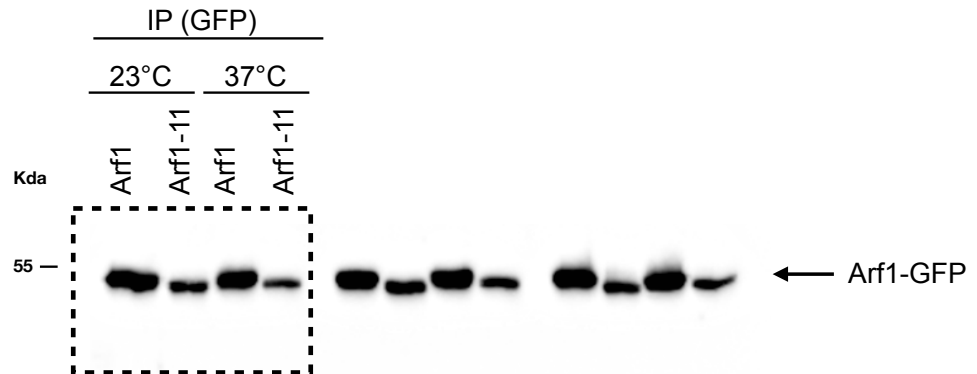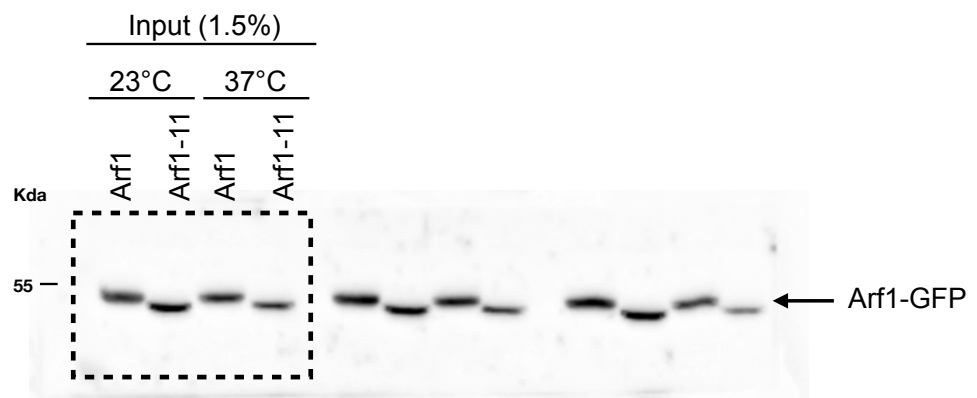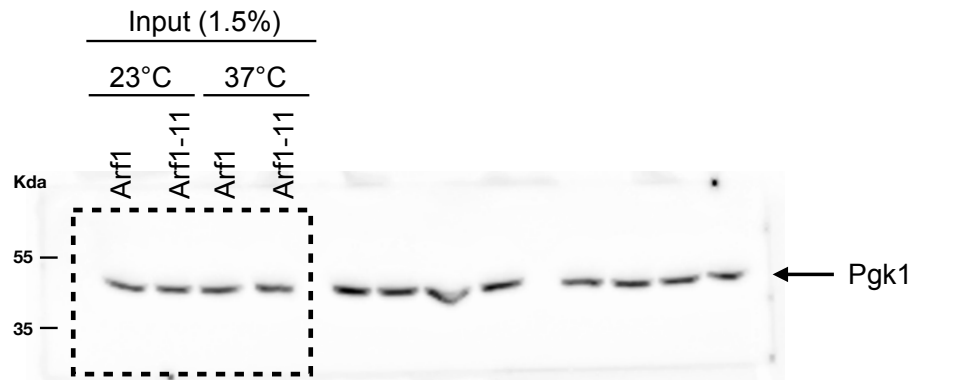



**WB related to Figure 7E**

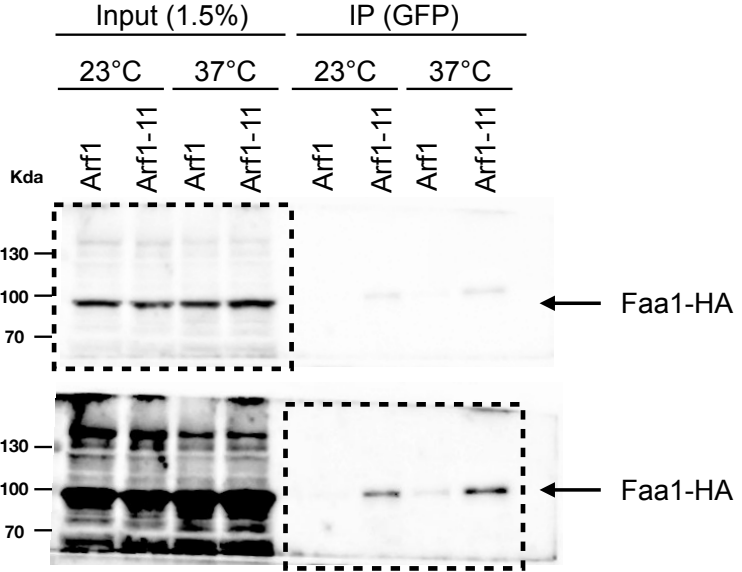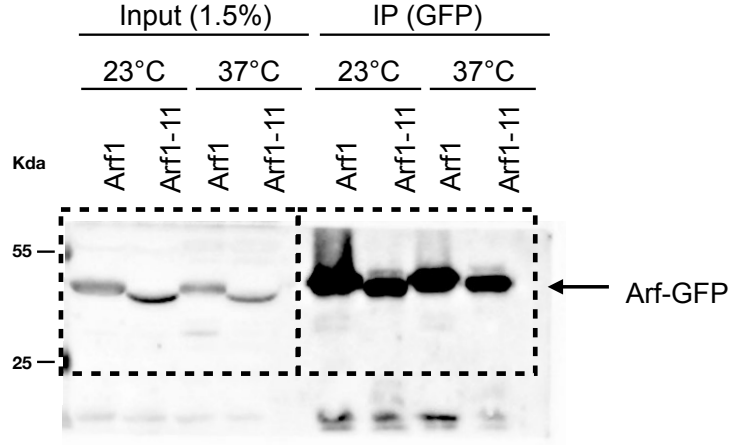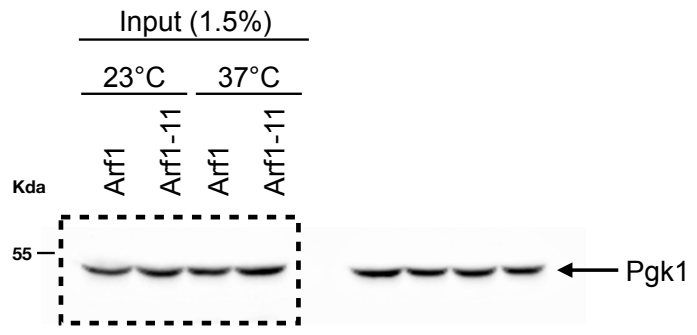

**WB related to Figure 7H**

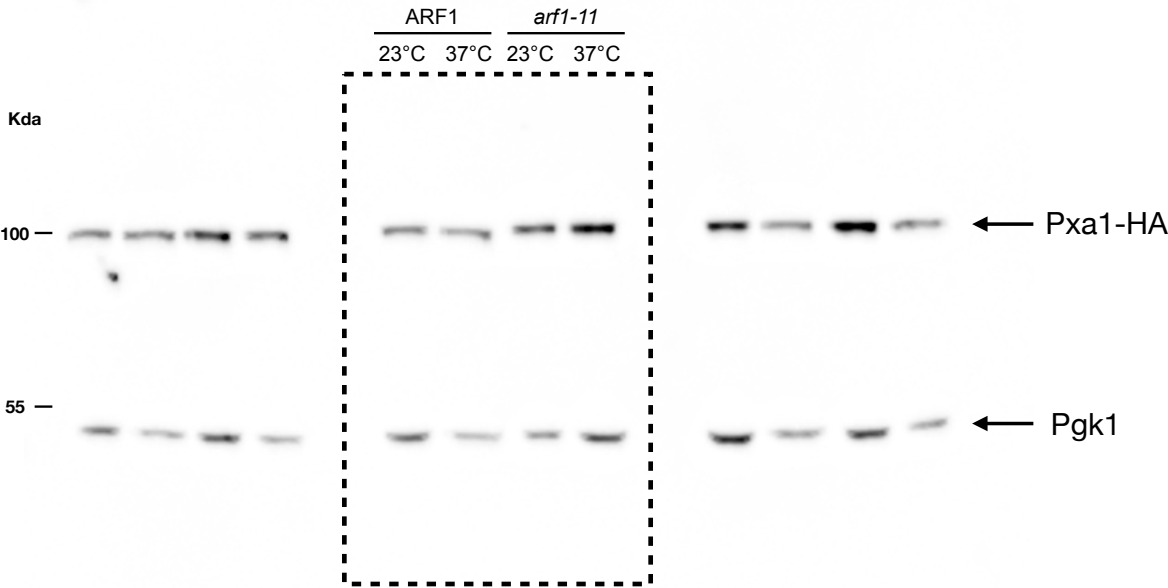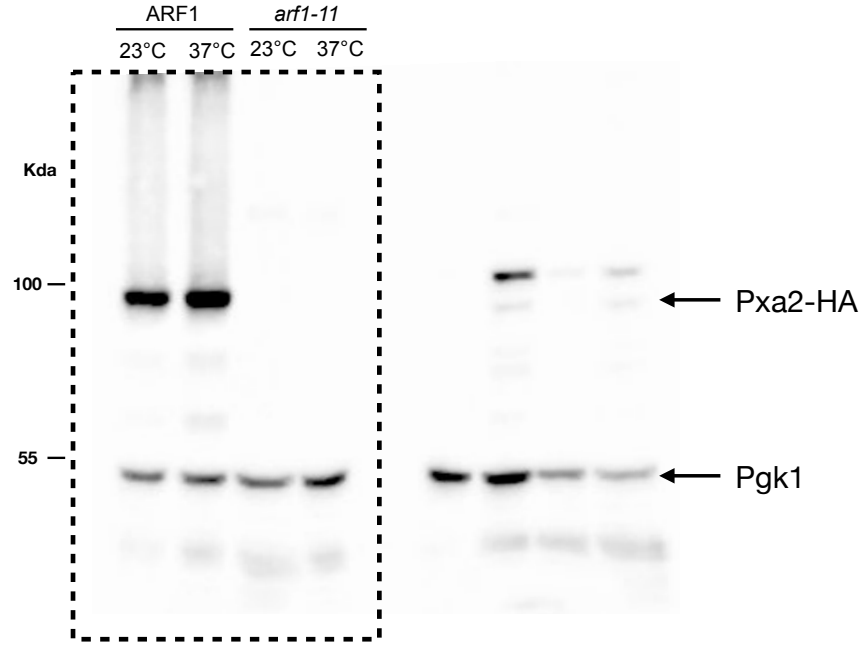

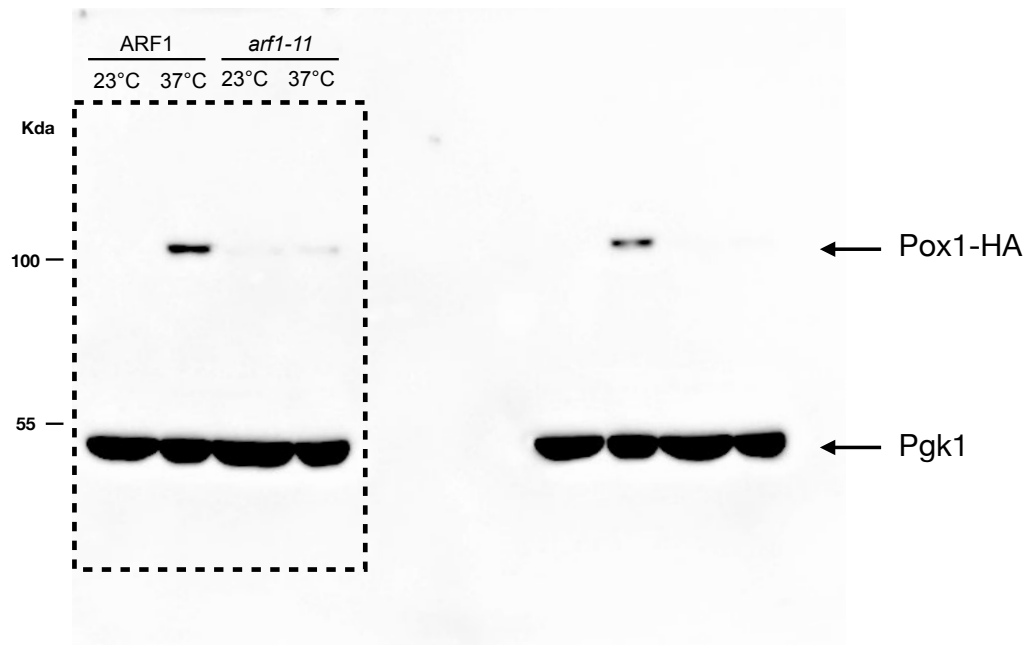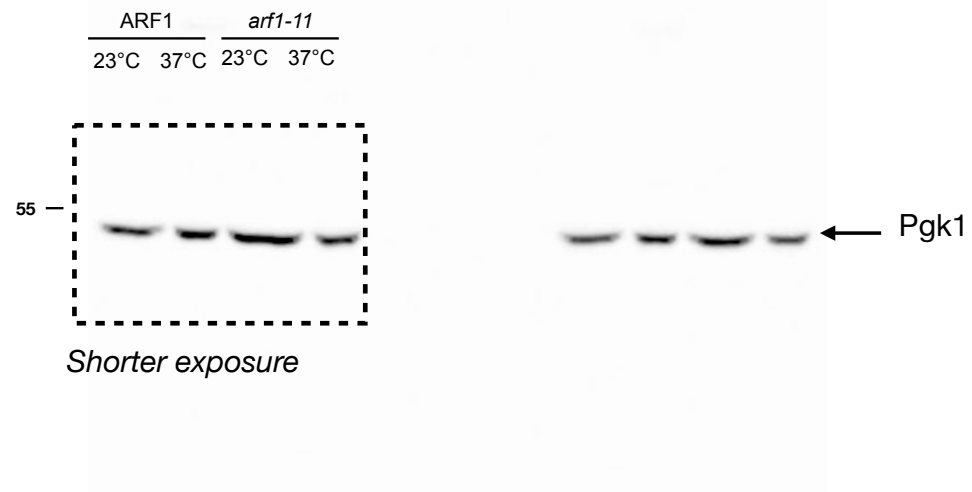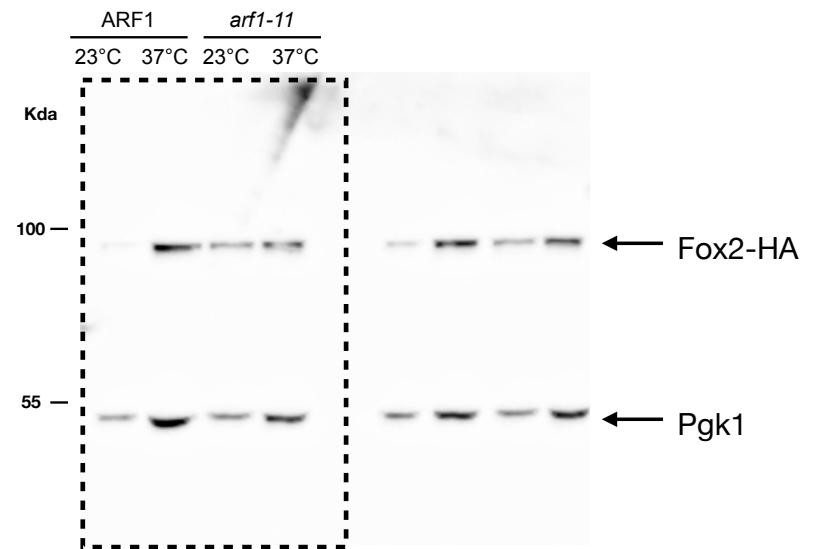

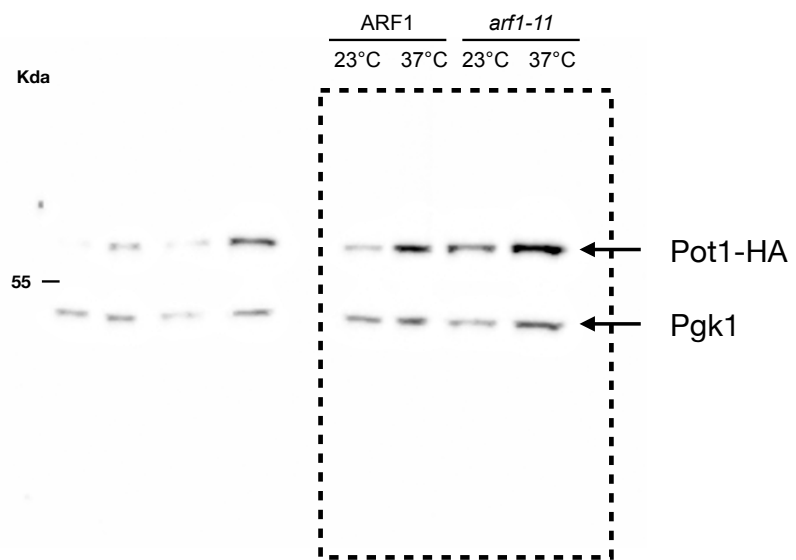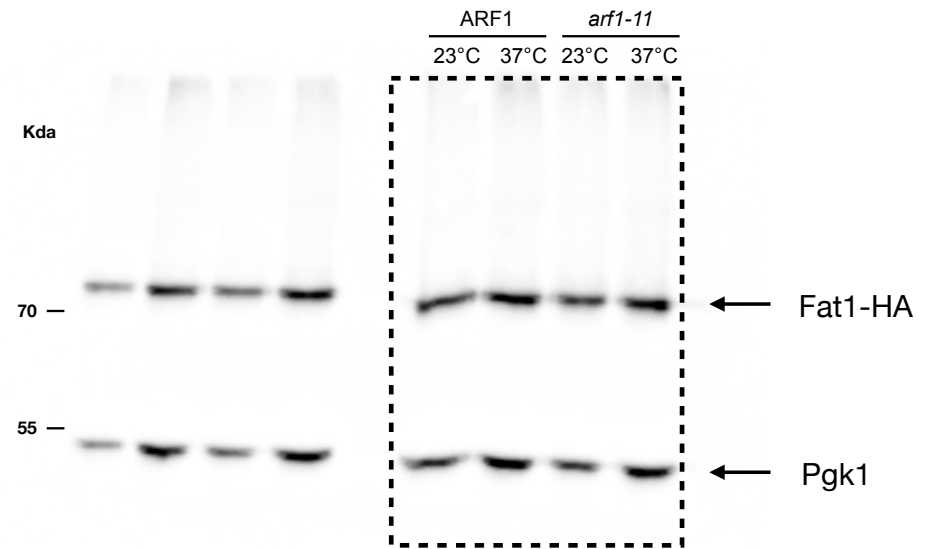

**WB related to ED figure 3B**

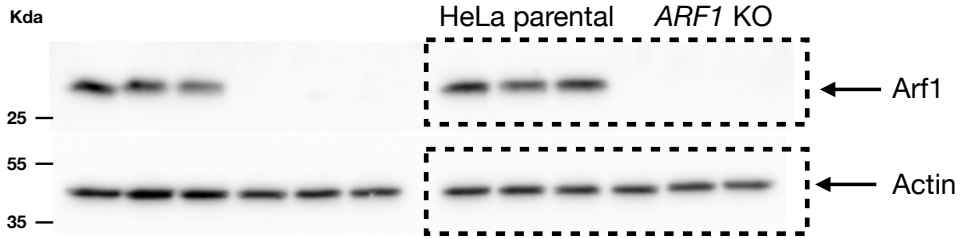

**WB related to ED figure 3C**

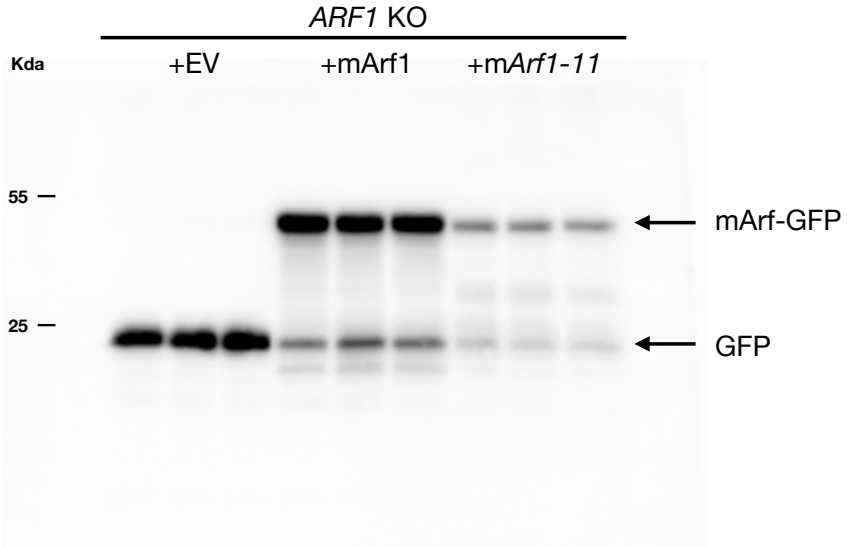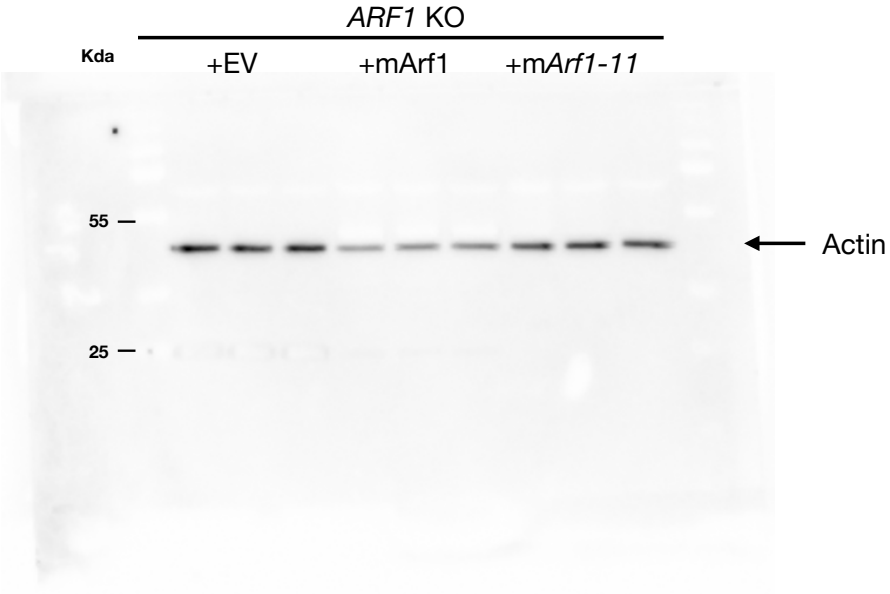

**WB related to ED figure 5F**

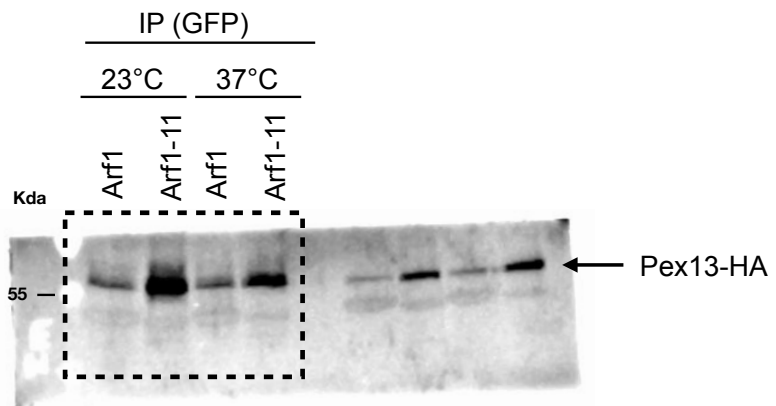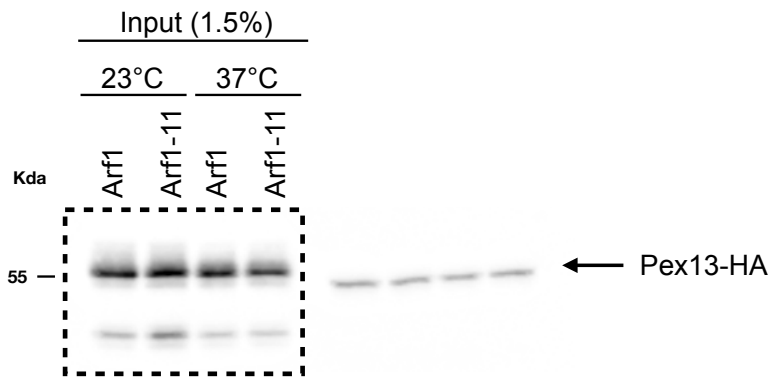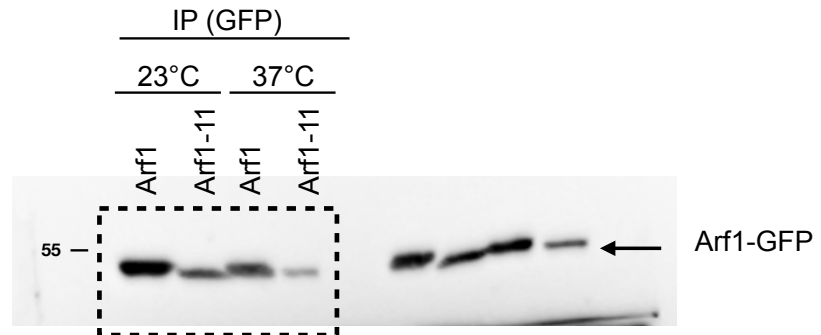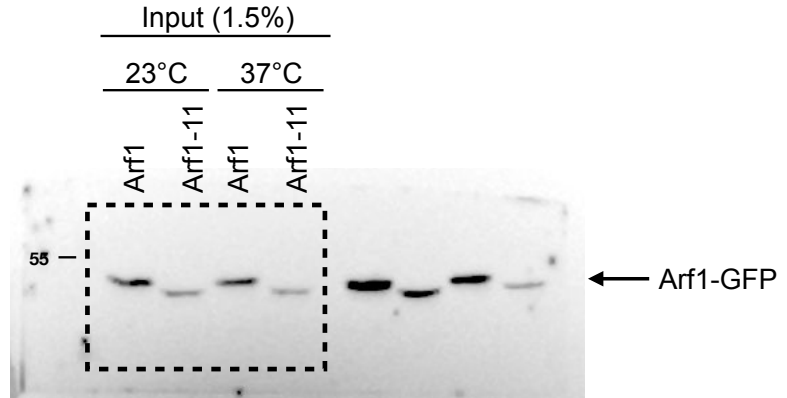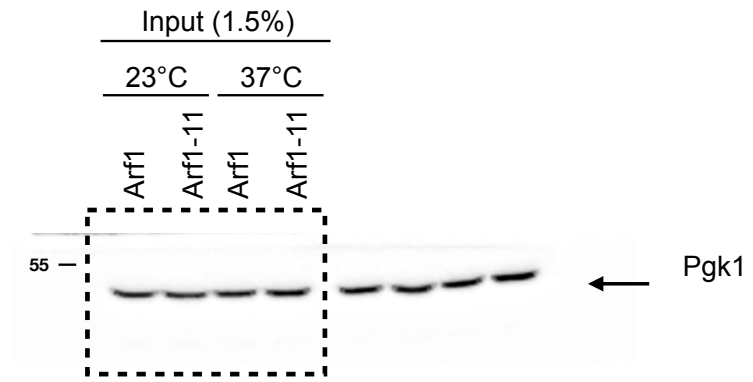

Supplement: 41556_2023_1180_MOESM21_ESM.pdf [file 41556_2023_1180_MOESM21_ESM.pdf]
